# Supplementary material
Source: PubMed Central journal article supplement (PMC4791823)
Supplement: CJN.07610715_CJN07610715SupplementaryData.pdf [file CJN.07610715_CJN07610715SupplementaryData.pdf]

Supplementary Material

**Table: International Classification of Diseases, Ninth Revision (ICD-9) Diagnostic and Procedure codes used to Identify Kidney Stone Events**

| ICD-9 Diagnosis Code | Description                   | ICD-9-CM Procedure Code | Description                                                               |
|----------------------|-------------------------------|-------------------------|---------------------------------------------------------------------------|
| 592.0                | Calculus of Kidney            | 55.03                   | Percutaneous Nephrostomy Without Fragmentation                            |
| 592.1                | Calculus of Ureter            | 55.04                   | Percutaneous Nephrostomy With Fragmentation                               |
| 592.9                | Urinary calculus, unspecified | 56.0                    | Transurethral removal of obstruction from ureter and renal pelvis         |
| 274.11               | Uric acid nephrolithiasis     | 56.2                    | Ureterotomy                                                               |
|                      |                               | 59.8                    | Ureteral catheterization                                                  |
|                      |                               | 59.95                   | Ultrasonic fragmentation of urinary stones                                |
|                      |                               | 98.51                   | Extracorporeal shockwave lithotripsy of the kidney, ureter and/or bladder |

Statistical Models

We used linear mixed effects models to describe the incidence trajectories over time in various age, sex and race groups. Age is comprised of 8 categories: less than 10 years old, 10-14 years old, 15-19 years old, 20-24 years old, 25-34 years old, 35-44 years old, 45-64 years old, and over 65 years old. Race is comprised of 3 categories: Caucasian, African-American and “other”. The model for kidney stone case counts is given by:

$$Y_{ijklt} \sim \text{Poisson}(N_{ijklt}\theta_{ijklt}),$$

where  $i=1, \dots, 46$ ,  $j=1, \dots, 8$ ,  $k=1,2$ ,  $l=1,2,3$ ,  $t=1, \dots, 16$ ,  $Y_{ijklt}$  is the number of kidney stone cases in county  $i$ , age group  $j$ , sex  $k$ , race  $l$  at time  $t$ ,  $N_{ijklt}$  is the number of people in the population in county  $i$ , in age group  $j$ , sex  $k$ , race  $l$  at time  $t$ , and  $\theta_{ijklt}$  is the risk of kidney stones associated with county  $i$ , in age group  $j$ , sex  $k$ , race  $l$  at time  $t$ . For ease of presentation, we use the following variable names in the models below: “AgeCat” for age group, “Male” to indicate male sex, “Race” to indicate race category. The referent group is females less than 10 years of age of Caucasian race.

We specify random effects models for  $\theta_{ijklt}$  in which we allow global smoothing using independent random effects for county, denoted by  $b_i$ :

Model 0:  $\log \theta_{ijklt} = \beta_0 + \beta_1 t + b_i$

Model 1:  $\log \theta_{ijklt} = \beta_0 + \beta_1 t + \beta_2 \text{AgeCat2} + \beta_3 \text{AgeCat3} + \beta_4 \text{AgeCat4} + \beta_5 \text{AgeCat5}$   
 $+ \beta_6 \text{AgeCat6} + \beta_7 \text{AgeCat7} + \beta_8 \text{AgeCat8} + \beta_9 \text{Male} + \beta_{10} \text{Race2}$   
 $+ \beta_{11} \text{Race3} + \beta_{12} \text{AgeCat2: } t + \beta_{13} \text{AgeCat3: } t + \beta_{14} \text{AgeCat4: } t$   
 $+ \beta_{15} \text{AgeCat5: } t + \beta_{16} \text{AgeCat6: } t + \beta_{17} \text{AgeCat7: } t + \beta_{18} \text{AgeCat8: } t + b_i$

Model 2:

$\log \theta_{ijklt} = \beta_0 + \beta_1 t + \beta_2 \text{AgeCat2} + \beta_3 \text{AgeCat3} + \beta_4 \text{AgeCat4} + \beta_5 \text{AgeCat5}$   
 $+ \beta_6 \text{AgeCat6} + \beta_7 \text{AgeCat7} + \beta_8 \text{AgeCat8} + \beta_9 \text{Male} + \beta_{10} \text{Race2}$   
 $+ \beta_{11} \text{Race3} + \beta_{12} \text{Male: } t + b_i$

Model 3:

$\log \theta_{ijklt} = \beta_0 + \beta_1 t + \beta_2 \text{AgeCat2} + \beta_3 \text{AgeCat3} + \beta_4 \text{AgeCat4} + \beta_5 \text{AgeCat5}$   
 $+ \beta_6 \text{AgeCat6} + \beta_7 \text{AgeCat7} + \beta_8 \text{AgeCat8} + \beta_9 \text{Male} + \beta_{10} \text{Race2}$   
 $+ \beta_{11} \text{Race3} + \beta_{12} \text{AgeCat2: } t + \beta_{13} \text{AgeCat3: } t + \beta_{14} \text{AgeCat4: } t$   
 $+ \beta_{15} \text{AgeCat5: } t + \beta_{16} \text{AgeCat6: } t + \beta_{17} \text{AgeCat7: } t + \beta_{18} \text{AgeCat8: } t$   
 $+ \beta_{19} \text{Male: } t + \beta_{20} \text{AgeCat2: Male} + \beta_{21} \text{AgeCat3: Male}$   
 $+ \beta_{22} \text{AgeCat4: Male} + \beta_{23} \text{AgeCat5: Male} + \beta_{24} \text{AgeCat6: Male}$   
 $+ \beta_{25} \text{AgeCat7: Male} + \beta_{26} \text{AgeCat8: Male} + \beta_{27} \text{AgeCat2: Male: } t$   
 $+ \beta_{28} \text{AgeCat3: Male: } t + \beta_{29} \text{AgeCat4: Male: } t + \beta_{30} \text{AgeCat5: Male: } t$   
 $+ \beta_{31} \text{AgeCat6: Male: } t + \beta_{32} \text{AgeCat7: Male: } t + \beta_{33} \text{AgeCat8: Male: } t$   
 $+ b_i$

Model 4:

$\log \theta_{ijklt} = \beta_0 + \beta_1 t + \beta_2 \text{AgeCat2} + \beta_3 \text{AgeCat3} + \beta_4 \text{AgeCat4} + \beta_5 \text{AgeCat5}$   
 $+ \beta_6 \text{AgeCat6} + \beta_7 \text{AgeCat7} + \beta_8 \text{AgeCat8} + \beta_9 \text{Male} + \beta_{10} \text{Race2}$   
 $+ \beta_{11} \text{Race3} + \beta_{12} \text{Race2: } t + \beta_{13} \text{Race3: } t + b_i$

Model 5:

$\log \theta_{ijklt} = \beta_0 + \beta_1 t + \beta_2 \text{AgeCat2} + \beta_3 \text{AgeCat3} + \beta_4 \text{AgeCat4} + \beta_5 \text{AgeCat5}$   
 $+ \beta_6 \text{AgeCat6} + \beta_7 \text{AgeCat7} + \beta_8 \text{AgeCat8} + \beta_9 \text{Male} + \beta_{10} \text{Race2}$   
 $+ \beta_{11} \text{Race3} + \beta_{12} \text{Race2: } t + \beta_{13} \text{Race3: } t + \beta_{14} \text{Male: } t$   
 $+ \beta_{15} \text{Race2: Male} + \beta_{16} \text{Race3: Male} + \beta_{17} \text{Race2: Male: } t$   
 $+ \beta_{18} \text{Race3: Male: } t + b_i$

Model 6:

$\log \theta_{ijklt} = \beta_0 + \beta_1 t + \beta_2 \text{AgeCat2} + \beta_3 \text{AgeCat3} + \beta_4 \text{AgeCat4} + \beta_5 \text{AgeCat5}$   
 $+ \beta_6 \text{AgeCat6} + \beta_7 \text{AgeCat7} + \beta_8 \text{AgeCat8} + \beta_9 \text{Male} + \beta_{10} \text{Race2}$   
 $+ \beta_{11} \text{Race3} + \beta_{12} \text{AgeCat2: } t + \beta_{13} \text{AgeCat3: } t + \beta_{14} \text{AgeCat4: } t$   
 $+ \beta_{15} \text{AgeCat5: } t + \beta_{16} \text{AgeCat6: } t + \beta_{17} \text{AgeCat7: } t + \beta_{18} \text{AgeCat8: } t$   
 $+ \beta_{19} \text{Race2: } t + \beta_{20} \text{Race3: } t + \beta_{21} \text{AgeCat2: Race2} + \beta_{22} \text{AgeCat3: Race2}$   
 $+ \beta_{23} \text{AgeCat4: Race2} + \beta_{24} \text{AgeCat5: Race2} + \beta_{25} \text{AgeCat6: Race2}$   
 $+ \beta_{26} \text{AgeCat7: Race2} + \beta_{27} \text{AgeCat8: Race2} + \beta_{28} \text{AgeCat2: Race3}$   
 $+ \beta_{29} \text{AgeCat3: Race3} + \beta_{30} \text{AgeCat4: Race3} + \beta_{31} \text{AgeCat5: Race3}$   
 $+ \beta_{32} \text{AgeCat6: Race3} + \beta_{33} \text{AgeCat7: Race3} + \beta_{34} \text{AgeCat8: Race3}$

$$\begin{aligned}
& +\beta_{35}AgeCat2: Race2: t + \beta_{36}AgeCat3: Race2: t + \beta_{37}AgeCat4: Race2: t \\
& +\beta_{38}AgeCat5: Race2: t + \beta_{39}AgeCat6: Race2: t + \beta_{40}AgeCat7: Race2: t \\
& +\beta_{41}AgeCat8: Race2: t + \beta_{42}AgeCat2: Race3: t + \beta_{43}AgeCat3: Race3: t \\
& +\beta_{44}AgeCat4: Race3: t + \beta_{45}AgeCat5: Race3: t + \beta_{46}AgeCat6: Race3: t \\
& +\beta_{47}AgeCat7: Race3: t + \beta_{48}AgeCat8: Race3: t + b_i
\end{aligned}$$

Table 1 displays the coefficients and 95% credible intervals from fitting the above models. We summed the coefficients from the main effect for time with the time-by-group interaction terms to obtain the incidence trajectory over time in specific age, sex, and race groups, which are provided in Table 3 of the manuscript.

**Table:** Model coefficients and 95% credible intervals (CIs) from fitting seven regression models to describe kidney stone incidence over time across different age, sex and race groups.\* denotes statistical significance, which is defined by the exclusion of 0 from the 95% credible intervals.

|                            | Estimate | 95% CI             |
|----------------------------|----------|--------------------|
| <b>Model 0</b>             |          |                    |
| Intercept                  | -6.171   | (-6.253, -6.09)*   |
| Time                       | 0.010    | (0.009, 0.011)*    |
| <b>Model 1</b>             |          |                    |
| Intercept                  | -10.072  | (-10.196, -9.951)* |
| Male                       | 0.529    | (0.518, 0.539)*    |
| Time                       | 0.018    | (-0.004, 0.039)    |
| Age Group 10-14 years      | 1.601    | (1.485, 1.718)*    |
| Age Group 15-19 years      | 3.139    | (3.038, 3.243)*    |
| Age Group 20-24 years      | 3.808    | (3.709, 3.910)*    |
| Age Group 25-34 years      | 4.209    | (4.111, 4.310)*    |
| Age Group 35-44 years      | 4.291    | (4.193, 4.392)*    |
| Age Group 45-64 years      | 4.240    | (4.142, 4.340)*    |
| Age Group 65+ years        | 3.908    | (3.81, 4.009)*     |
| African American Race      | -0.986   | (-1.002, -0.970)*  |
| "Other" Race               | -0.515   | (-0.545, -0.485)*  |
| Time:Age Group 10-14 years | 0.018    | (-0.007, 0.044)    |
| Time:Age Group 15-19 years | 0.028    | (0.006, 0.050)*    |
| Time:Age Group 20-24 years | 0.009    | (-0.013, 0.031)    |
| Time:Age Group 25-34 years | -0.005   | (-0.027, 0.016)    |
| Time:Age Group 35-44 years | -0.003   | (-0.024, 0.019)    |
| Time:Age Group 45-64 years | -0.023   | (-0.044, -0.001)*  |
| Time:Age Group 65+ years   | -0.002   | (-0.024, 0.020)    |
| <b>Model 2</b>             |          |                    |
| Intercept                  | -10.076  | (-10.199, -9.955)* |
| Male                       | 0.532    | (0.521, 0.542)*    |
| Time                       | 0.028    | (0.026, 0.030)*    |
| Age Group 10-14 years      | 1.602    | (1.487, 1.720)*    |
| Age Group 15-19 years      | 3.150    | (3.049, 3.254)*    |
| Age Group 20-24 years      | 3.811    | (3.712, 3.913)*    |
| Age Group 25-34 years      | 4.208    | (4.110, 4.308)*    |
| Age Group 35-44 years      | 4.289    | (4.191, 4.389)*    |
| Age Group 45-64 years      | 4.237    | (4.139, 4.337)*    |

|                                 |         |                    |
|---------------------------------|---------|--------------------|
| Age Group 65+ years             | 3.912   | (3.813, 4.013)*    |
| African American Race           | -0.987  | (-1.003, -0.971)*  |
| "Other" Race                    | -0.509  | (-0.539, -0.479)*  |
| Time:Male                       | -0.030  | (-0.032, -0.028)*  |
| <b>Model 3</b>                  |         |                    |
| Intercept                       | -9.815  | (-9.979, -9.656)*  |
| Male                            | 0.088   | (-0.110, 0.285)    |
| Time                            | 0.020   | (-0.012, 0.051)    |
| Age Group 10-14 years           | 1.690   | (1.524, 1.861)*    |
| Age Group 15-19 years           | 3.377   | (3.231, 3.529)*    |
| Age Group 20-24 years           | 3.873   | (3.728, 4.023)*    |
| Age Group 25-34 years           | 4.077   | (3.934, 4.225)*    |
| Age Group 35-44 years           | 4.045   | (3.902, 4.193)*    |
| Age Group 45-64 years           | 3.853   | (3.711, 4.001)*    |
| Age Group 65+ years             | 3.445   | (3.302, 3.594)*    |
| African American Race           | -0.986  | (-1.002, -0.970)*  |
| "Other" Race                    | -0.504  | (-0.534, -0.474)*  |
| Time:Male                       | -0.004  | (-0.047, 0.039)    |
| Male:Age Group 10-14 years      | -0.175  | (-0.409, 0.058)    |
| Time:Age Group 10-14 years      | 0.028   | (-0.009, 0.065)    |
| Male:Age Group 15-19 years      | -0.500  | (-0.706, -0.295)*  |
| Time:Age Group 15-19 years      | 0.029   | (-0.004, 0.061)    |
| Male:Age Group 20-24 years      | -0.125  | (-0.328, 0.076)    |
| Time:Age Group 20-24 years      | 0.015   | (-0.017, 0.047)    |
| Male:Age Group 25-34 years      | 0.230   | (0.030, 0.429)*    |
| Time:Age Group 25-34 years      | 0.012   | (-0.020, 0.043)    |
| Male:Age Group 35-44 years      | 0.419   | (0.220, 0.618)*    |
| Time:Age Group 35-44 years      | 0.016   | (-0.016, 0.048)    |
| Male:Age Group 45-64 years      | 0.639   | (0.440, 0.837)*    |
| Time:Age Group 45-64 years      | -0.001  | (-0.033, 0.031)    |
| Male:Age Group 65+ years        | 0.786   | (0.586, 0.985)*    |
| Time:Age Group 65+ years        | 0.010   | (-0.022, 0.042)    |
| Male:Time:Age Group 10-14 years | -0.020  | (-0.071, 0.031)    |
| Male:Time:Age Group 15-19 years | -0.003  | (-0.048, 0.042)    |
| Male:Time:Age Group 20-24 years | -0.013  | (-0.057, 0.031)    |
| Male:Time:Age Group 25-34 years | -0.028  | (-0.071, 0.015)    |
| Male:Time:Age Group 35-44 years | -0.029  | (-0.072, 0.015)    |
| Male:Time:Age Group 45-64 years | -0.031  | (-0.075, 0.012)    |
| Male:Time:Age Group 65+ years   | -0.020  | (-0.063, 0.024)    |
| <b>Model 4</b>                  |         |                    |
| Intercept                       | -10.073 | (-10.196, -9.952)* |
| Male                            | 0.529   | (0.519, 0.539)*    |
| African American Race           | -0.990  | (-1.006, -0.975)*  |
| "Other" Race                    | -0.614  | (-0.649, -0.581)*  |
| Time                            | 0.005   | (0.004, 0.006)*    |
| Age Group 10-14 years           | 1.603   | (1.488, 1.720)*    |
| Age Group 15-19 years           | 3.151   | (3.050, 3.255)*    |
| Age Group 20-24 years           | 3.813   | (3.713, 3.915)*    |
| Age Group 25-34 years           | 4.208   | (4.110, 4.309)*    |

|                                             |         |                    |
|---------------------------------------------|---------|--------------------|
| Age Group 35-44 years                       | 4.289   | (4.191, 4.389)*    |
| Age Group 45-64 years                       | 4.238   | (4.140, 4.338)*    |
| Age Group 65+ years                         | 3.912   | (3.814, 4.013)*    |
| African American Race: Time                 | 0.024   | (0.020, 0.027)*    |
| "Other" Race: Time                          | 0.066   | (0.059, 0.074)*    |
| <b>Model 5</b>                              |         |                    |
| Intercept                                   | -10.102 | (-10.225, -9.981)* |
| Male                                        | 0.575   | (0.563, 0.586)*    |
| African American Race                       | -0.804  | (-0.827, -0.781)*  |
| "Other" Race                                | -0.572  | (-0.631, -0.513)*  |
| Time                                        | 0.025   | (0.023, 0.027)*    |
| Age Group 10-14 years                       | 1.604   | (1.488, 1.721)*    |
| Age Group 15-19 years                       | 3.152   | (3.050, 3.255)*    |
| Age Group 20-24 years                       | 3.812   | (3.712, 3.914)*    |
| Age Group 25-34 years                       | 4.206   | (4.108, 4.307)*    |
| Age Group 35-44 years                       | 4.287   | (4.189, 4.388)*    |
| Age Group 45-64 years                       | 4.236   | (4.139, 4.337)*    |
| Age Group 65+ years                         | 3.912   | (3.814, 4.013)*    |
| African American Race:Male                  | -0.331  | (-0.362, -0.300)*  |
| "Other" Race:Male                           | -0.067  | (-0.139, 0.006)    |
| Male:Time                                   | -0.031  | (-0.033, -0.029)*  |
| African American Race: Time                 | 0.014   | (0.009, 0.019)*    |
| "Other" Race: Time                          | 0.065   | (0.052, 0.077)*    |
| African American Race: Time:Male            | 0.013   | (0.006, 0.019)*    |
| "Other" Race: Time:Male                     | 0.004   | (-0.012, 0.019)    |
| <b>Model 6</b>                              |         |                    |
| Intercept                                   | -9.944  | (-10.073, -9.818)* |
| Male                                        | 0.530   | (0.520, 0.540)*    |
| African American Race                       | -1.523  | (-1.848, -1.218)*  |
| "Other" Race                                | -2.804  | (-4.098, -1.777)*  |
| Time                                        | 0.021   | (-0.002, 0.043)    |
| Age Group 10-14 years                       | 1.631   | (1.509, 1.755)*    |
| Age Group 15-19 years                       | 3.136   | (3.028, 3.246)*    |
| Age Group 20-24 years                       | 3.738   | (3.632, 3.846)*    |
| Age Group 25-34 years                       | 4.115   | (4.011, 4.223)*    |
| Age Group 35-44 years                       | 4.165   | (4.061, 4.272)*    |
| Age Group 45-64 years                       | 4.082   | (3.978, 4.189)*    |
| Age Group 65+ years                         | 3.742   | (3.637, 3.849)*    |
| African American Race: Time                 | 0.021   | (-0.048, 0.090)    |
| "Other" Race: Time                          | -0.147  | (-0.411, 0.106)    |
| African American Race:Age Group 10-14 years | -0.603  | (-1.003, -0.197)*  |
| "Other" Race: Age Group 10-14 years         | 1.009   | (-0.155, 2.412)    |
| Time:Age Group 10-14 years                  | 0.018   | (-0.009, 0.044)    |
| African American Race:Age Group 15-19 years | -0.257  | (-0.578, 0.083)    |
| "Other" Race: Age Group 15-19 years         | 1.349   | (0.295, 2.663)*    |
| Time:Age Group 15-19 years                  | 0.023   | (-0.001, 0.047)    |
| African American Race:Age Group 20-24 years | 0.270   | (-0.040, 0.602)    |
| "Other" Race: Age Group 20-24 years         | 1.726   | (0.690, 3.026)*    |
| Time:Age Group 20-24 years                  | 0.003   | (-0.020, 0.027)    |

|                                                  |        |                   |
|--------------------------------------------------|--------|-------------------|
| African American Race:Age Group 25-34 years      | 0.386  | (0.079, 0.713)*   |
| "Other" Race: Age Group 25-34 years              | 1.873  | (0.841, 3.169)*   |
| Time:Age Group 25-34 years                       | -0.010 | (-0.033, 0.013)   |
| African American Race:Age Group 35-44 years      | 0.523  | (0.217, 0.850)*   |
| "Other" Race: Age Group 35-44 years              | 2.196  | (1.163, 3.491)*   |
| Time:Age Group 35-44 years                       | -0.009 | (-0.032, 0.014)   |
| African American Race:Age Group 45-64 years      | 0.682  | (0.377, 1.009)*   |
| "Other" Race: Age Group 45-64 years              | 2.540  | (1.508, 3.835)*   |
| Time:Age Group 45-64 years                       | -0.031 | (-0.054, -0.008)* |
| African American Race:Age Group 65+ years        | 0.788  | (0.481, 1.117)*   |
| "Other" Race: Age Group 65+ years                | 2.813  | (1.774, 4.114)*   |
| Time:Age Group 65+ years                         | -0.010 | (-0.033, 0.013)   |
| African American Race:Time:Age Group 10-14 years | -0.030 | (-0.118, 0.058)   |
| "Other" Race:Time:Age Group 10-14 years          | 0.096  | (-0.185, 0.388)   |
| African American Race:Time:Age Group 15-19 years | -0.001 | (-0.074, 0.070)   |
| "Other" Race:Time:Age Group 15-19 years          | 0.210  | (-0.048, 0.479)   |
| African American Race:Time:Age Group 20-24 years | 0.008  | (-0.062, 0.078)   |
| "Other" Race:Time:Age Group 20-24 years          | 0.152  | (-0.102, 0.418)   |
| African American Race:Time:Age Group 25-34 years | 0.008  | (-0.062, 0.076)   |
| "Other" Race:Time:Age Group 25-34 years          | 0.160  | (-0.093, 0.425)   |
| African American Race:Time:Age Group 35-44 years | 0.005  | (-0.064, 0.074)   |
| "Other" Race:Time:Age Group 35-44 years          | 0.183  | (-0.070, 0.447)   |
| African American Race:Time:Age Group 45-64 years | -0.002 | (-0.071, 0.067)   |
| "Other" Race:Time:Age Group 45-64 years          | 0.254  | (0.001, 0.519)*   |
| African American Race:Time:Age Group 65+ years   | -0.003 | (-0.072, 0.066)   |
| "Other" Race:Time:Age Group 65+ years            | 0.317  | (0.063, 0.583)*   |
